# Supplementary material for: Classroom language during COVID-19: Associations between mask-wearing and objectively measured teacher and preschooler vocalizations
Source: Frontiers journal article supplement (doi:10.3389/fpsyg.2022.874293), 2022-11-09
Supplement: Data_Sheet_1.PDF [file Data_Sheet_1.PDF]

## *Supplementary Material*

**Supplementary Table 1**

| Cohort                | Observation period         | # of recording sessions | Mean duration of recording sessions in hours (SD) | Total # of hours of audio data | TH <i>n</i> /<br>HL <i>n</i> | CI <i>n</i> /<br>HA <i>n</i> | Female <i>n</i> /<br>Male <i>n</i> | Monolingual <i>n</i> /<br>Bilingual <i>n</i> /<br>Trilingual <i>n</i> | Mean age in months (SD) | Mean age when child received CI/HA in months** (SD) | Mean hearing age in months*** (SD) |
|-----------------------|----------------------------|-------------------------|---------------------------------------------------|--------------------------------|------------------------------|------------------------------|------------------------------------|-----------------------------------------------------------------------|-------------------------|-----------------------------------------------------|------------------------------------|
| 1                     | October 2019-February 2020 | 5                       | 1.96 (.29)                                        | 166.85                         | 11/9                         | 3/7*                         | 9/11                               | 6/13/1                                                                | 42.82 (3.55)            | 16.50 (8.91)                                        | 26.11 (9.07)                       |
| 2                     | March 2021-June 2021       | 7                       | 1.74 (.49)                                        | 151.13                         | 8/7                          | 3/4                          | 3/12                               | 6/9/0                                                                 | 49.58 (4.44)            | 19.36 (13.06)                                       | 32.44 (11.48)                      |
| <i>Overall Sample</i> |                            | 12                      | 1.83 (.31)                                        | 317.98                         | 19/16                        | 6/11*                        | 12/23                              | 12/22/1                                                               | 45.72 (5.17)            | 17.75 (10.61)                                       | 28.88 (10.35)                      |

*Notes.* TH—Typical Hearing; HL—Hearing Loss; CI—Cochlear Implant; HA—Hearing Aids. \*One child in Cohort 1 had both a CI and a HA. \*\*For children who had two hearing devices with separate implantation/fitting dates, the first implantation/fitting date was used for determining the age at which they received their CI or HA. \*\*\*Hearing age quantifies the time that children with hearing loss have had access to spoken language via a hearing device.
